# Supplementary material
Source: Springer Nature journal article supplement (https://www.springermedizin.de/resource/supplementary/12986_2009_253_MOESM2_ESM.pdf/25655688)

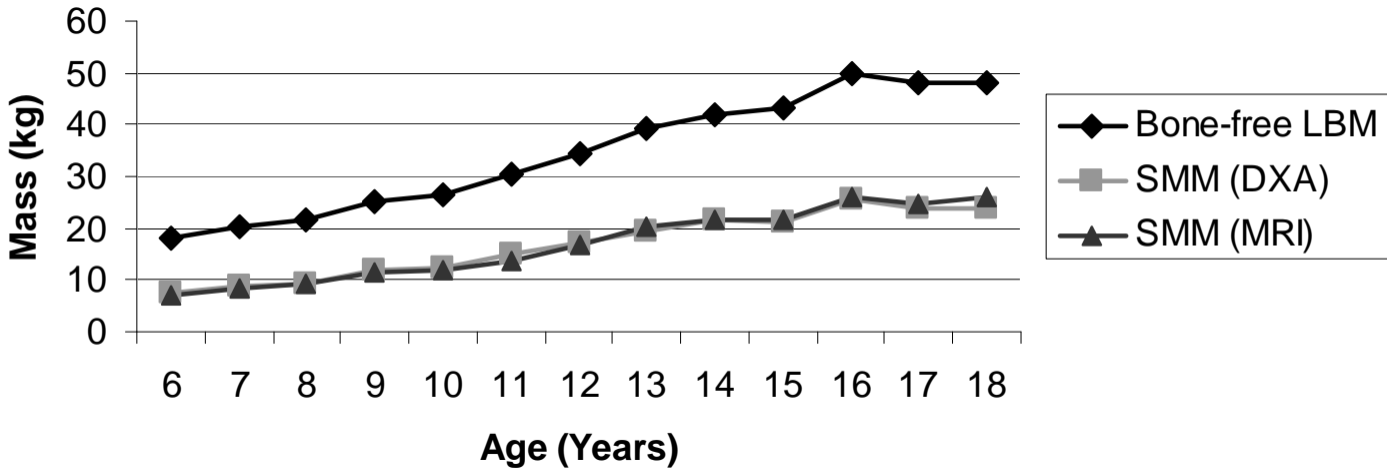

Supplement: MOESM2 [file 25655688]
